# Supplementary material
Source: Springer Nature journal article supplement (https://www.springermedizin.de/resource/supplementary/13601_2013_646_MOESM1_ESM.pdf/9677908)

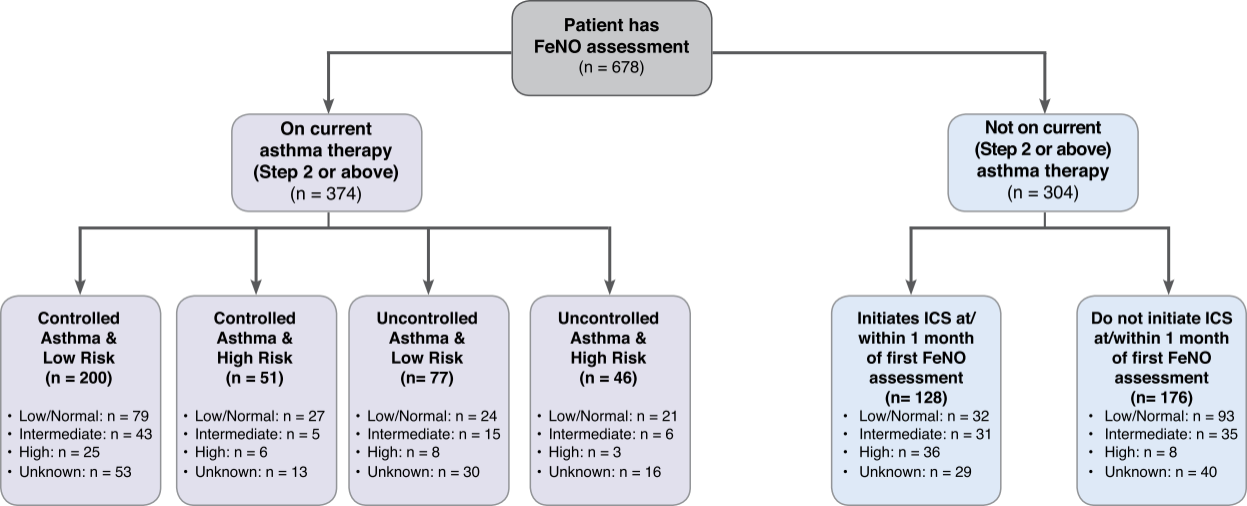

Supplement: MOESM1 [file 9677908]
